# Supplementary material for: Synaptic transistors based on a tyrosine-rich peptide for neuromorphic computing
Source: Royal Society of Chemistry journal article supplement (doi:10.1039/d1ra06492d), 2021-01-01
Supplement: d1ra06492d1.pdf [file d1ra06492d1.pdf]

## Supplementary Information for

# Synaptic Transistors Based on Tyrosine-Rich Peptide for Neuromorphic Computing

Min-Kyu Song<sup>1</sup>, Young-Woong Song<sup>1</sup>, Taehoon Sung<sup>1</sup>, Seok Daniel Namgung<sup>2,4</sup>, Jeong Hyun Yoon<sup>1</sup>, Yoon-Sik Lee<sup>3</sup>, Ki Tae Nam<sup>2,4</sup> and Jang-Yeon Kwon<sup>1\*</sup>

### Affiliations:

<sup>1</sup>School of Integrated Technology, Yonsei University, Incheon 21983, Republic of Korea.

<sup>2</sup>Department of Materials Science and Engineering, Seoul National University, Seoul 08826, Republic of Korea.

<sup>3</sup>School of Chemical and Biological Engineering, Seoul National University, Seoul 08826, Republic of Korea.

<sup>4</sup>Soft Foundry, Seoul National University, Seoul 08826, Republic of Korea.

\*Corresponding author. Email: [jangyeon@yonsei.ac.kr](mailto:jangyeon@yonsei.ac.kr) (J.-Y. K)

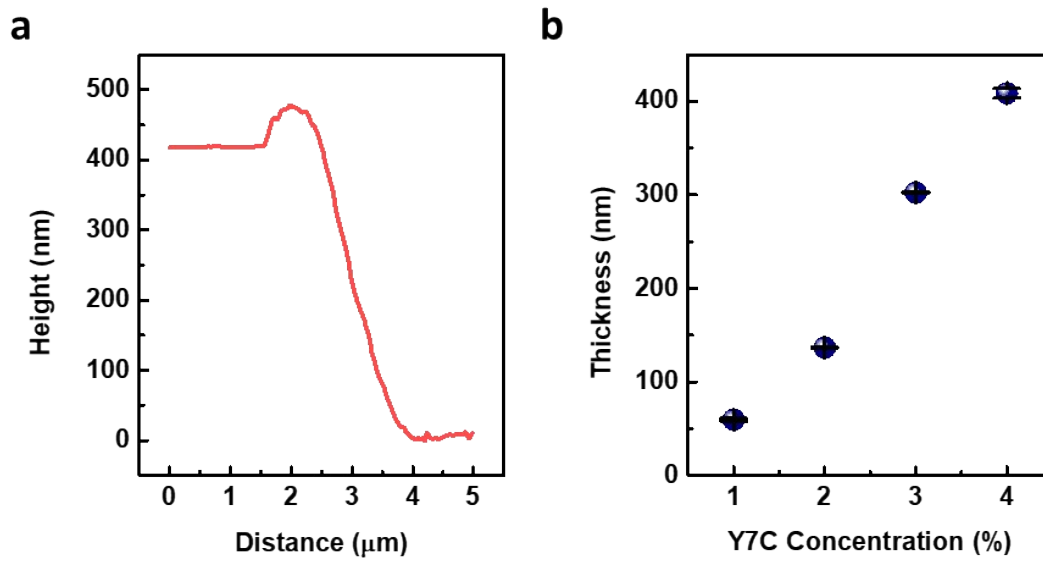

**Figure S1.** (a) AFM surface profile of the Y7C film after spin-coating 4 wt% Y7C solution. (b) Thickness of Y7C film as a function of Y7C concentration in TFA solution.

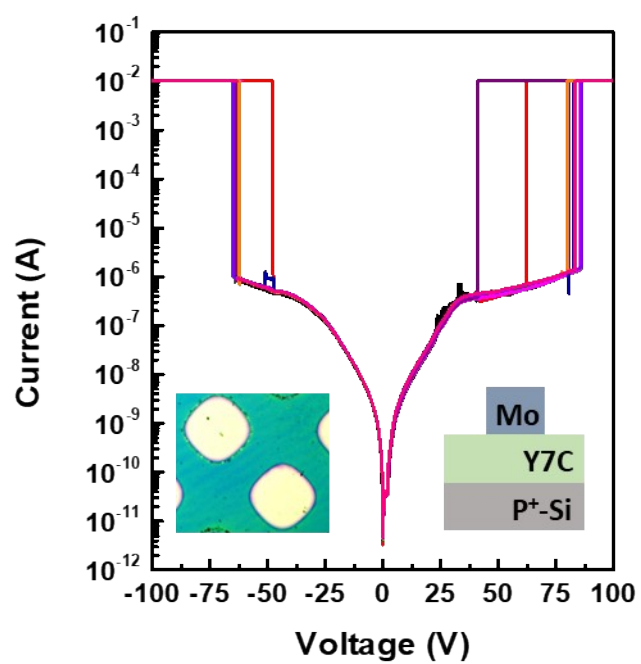

**Figure S2.** I-V characteristics of the Y7C peptide film. Insets show an optical image of top view (left) and a schematic image (right) of the device structure for IV measurement.

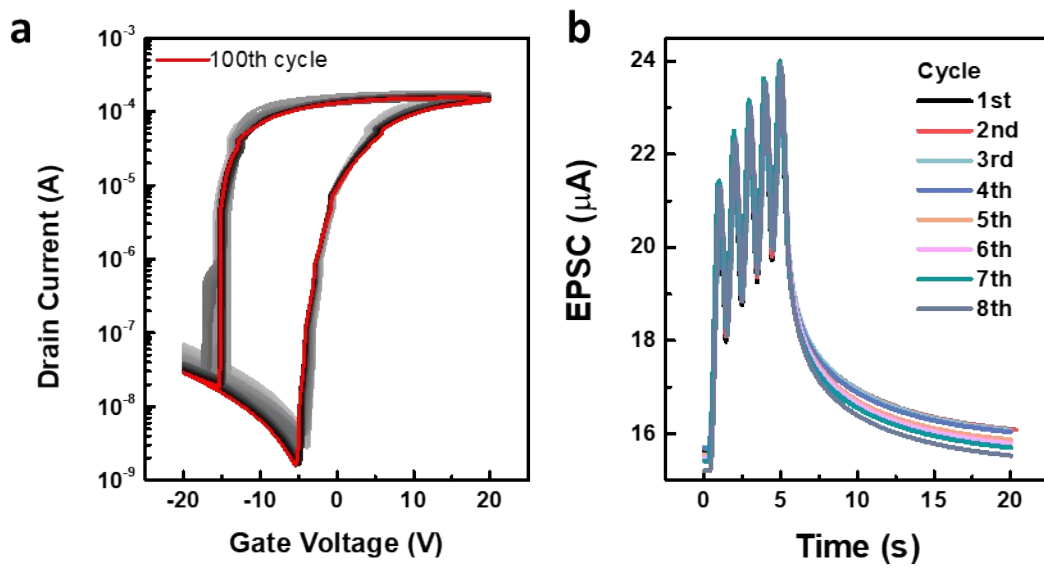

**Figure S3.** The response of (a) the transfer curves to 100 times repeated gate sweeps and (b) the pulse facilitation to 8 times repeated five consecutive presynaptic stimuli.
